# Supplementary material for: Machine-learning-aided identification of ethanol in humid air using zinc complex capped CsPbBr3 resistive sensors
Source: Royal Society of Chemistry journal article supplement (doi:10.1039/d3nj02357e), 2023-01-01
Supplement: d3nj02357e1.pdf [file d3nj02357e1.pdf]

Electronic Supplementary Material (ESI) for New Journal of Chemistry. This journal is ©  
The Royal Society of Chemistry 2023

## Supplemental Information

### Machine-learning-aided Identification of Ethanol in Humid Air Using Zinc Complex Capped CsPbBr<sub>3</sub> Quantum-dot Sensors

Yue Wang<sup>a,c,d,†</sup>, Xi Wang<sup>c,e,‡</sup>, Hui Zhang<sup>a</sup>, Shasha Gao<sup>a</sup>, Wenjie Xu<sup>a</sup>, Yulong Zhao<sup>a</sup>, Mingzhi  
Jiao<sup>c,e,\*</sup>, Sheng Huang<sup>a,\*</sup> and Xiuquan Gu<sup>a,b\*</sup>

<sup>a</sup> School of Materials Science and Physics, China University of Mining and Technology, Xuzhou,  
221116, China.

<sup>b</sup> State Key Laboratory of Silicon, Zhejiang University, Hangzhou, 310027, China

<sup>c</sup> School of Information and Control Engineering, China University of Mining and Technology,  
Xuzhou 221116, China.

<sup>d</sup> Yuyao Sunny Intelligent Optical Technology Co., Ltd, Ningbo, 315400, P. R. China

<sup>e</sup> State and Local Joint Engineering Laboratory of Perception Mine, China University of Mining  
and Technology, Xuzhou 221116, China

† Electronic supplementary information (ESI) available. See DOI:xxxxxxx

‡ These authors contributed equally.

\*These authors are corresponding authors.

To whom correspondence should be addressed:

\*Dr. Xiuquan Gu

E-mail: [xqgu@cumt.edu.cn](mailto:xqgu@cumt.edu.cn)

\*Dr. Sheng Huang

E-mail: [huangsheng@cumt.edu.cn](mailto:huangsheng@cumt.edu.cn)

\*\*Dr. Mingzhi Jiao

E-mail: [mingzhijiao@cumt.edu.cn](mailto:mingzhijiao@cumt.edu.cn)

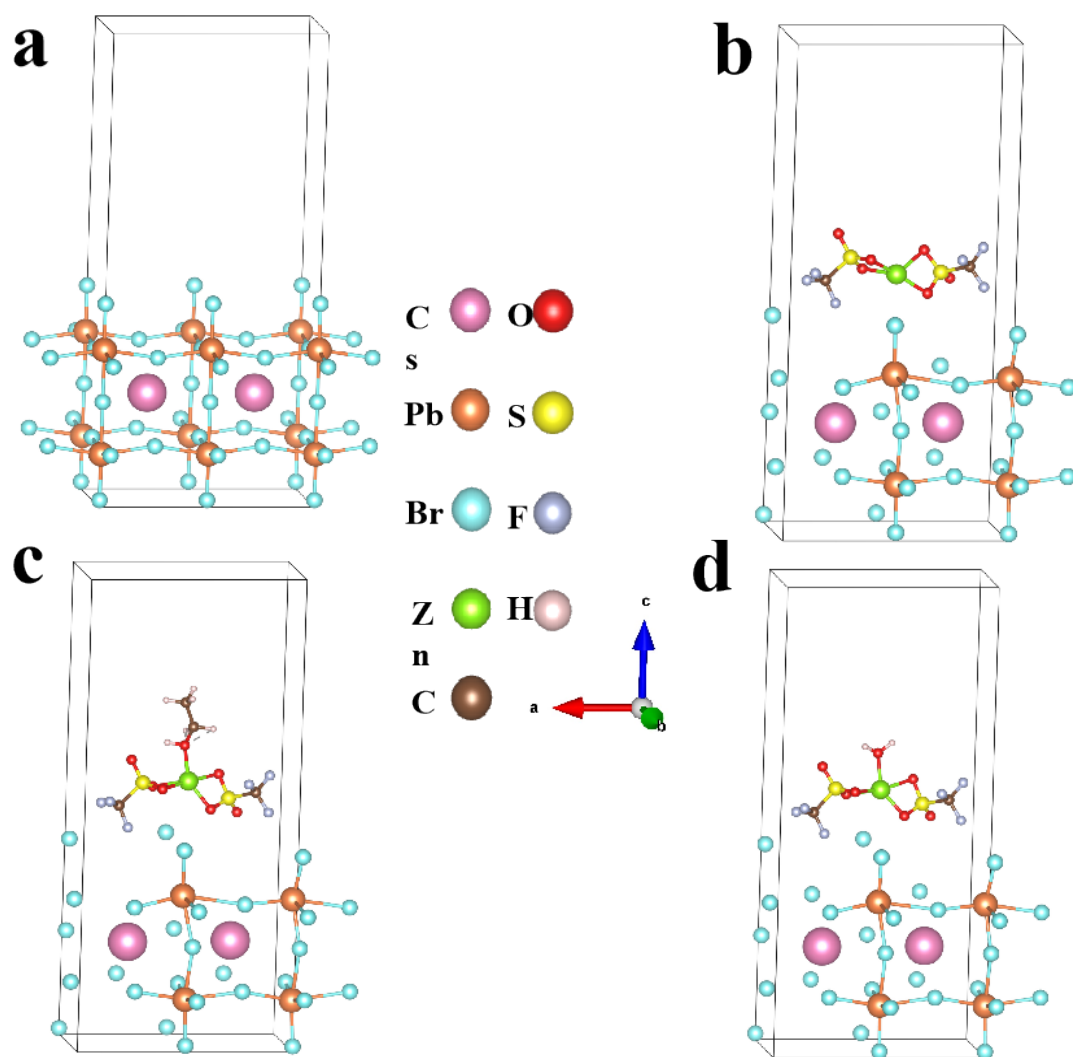

**Fig. S1** Crystal structure of (a) CsPbBr<sub>3</sub> and (b) CsPbBr<sub>3</sub>-Zn QDs and (c) CsPbBr<sub>3</sub>-Zn QDs absorbing ethanol and (d) CsPbBr<sub>3</sub>-Zn QDs absorbing H<sub>2</sub>O. The cyan, orange, pink, purple, red, brown, yellow, silvery, green represent the atoms Cs, Pb, Br, Zn, O, C, S, F and H, respectively.

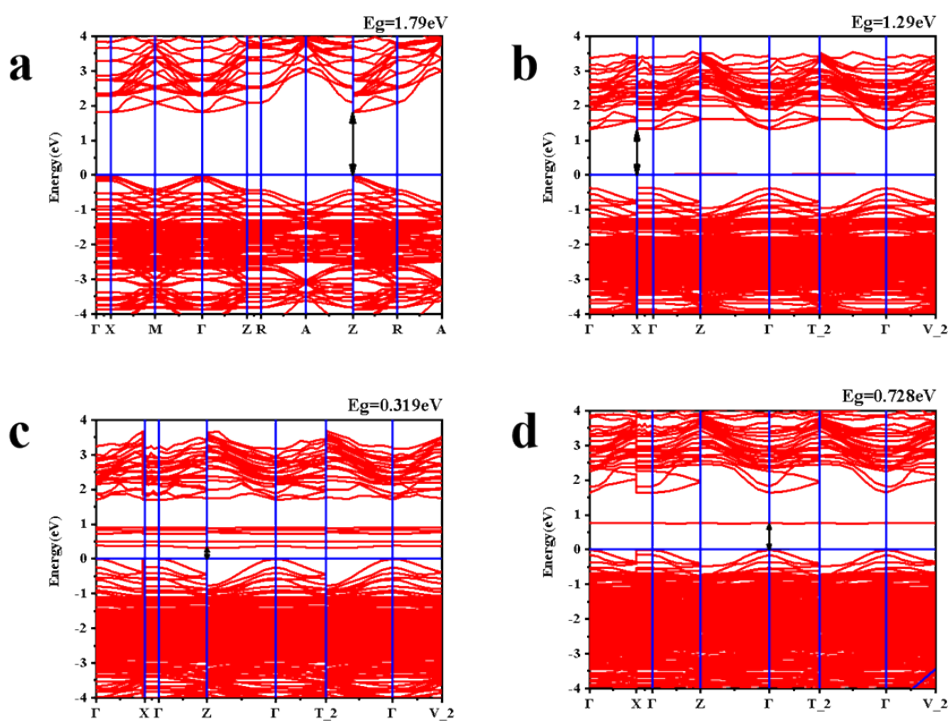

**Fig. S2** DFT calculation results from Fig. S1: Energy band diagram of (a) CsPbBr<sub>3</sub> and (b) CsPbBr<sub>3</sub>-Zn QDs and (c) CsPbBr<sub>3</sub>-Zn QDs absorbing ethanol and (d) CsPbBr<sub>3</sub>-Zn QDs absorbing H<sub>2</sub>O.

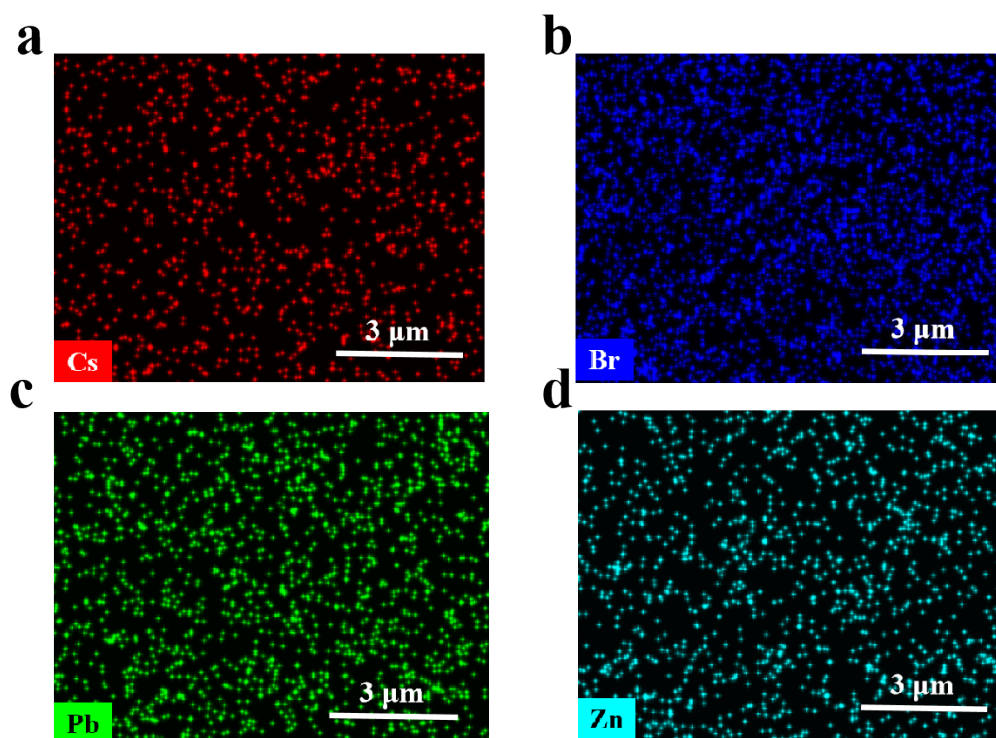

**Fig. S3** Elemental mapping of Cs, Br, Pb and Zn in the CsPbBr<sub>3</sub>-Zn QDs.

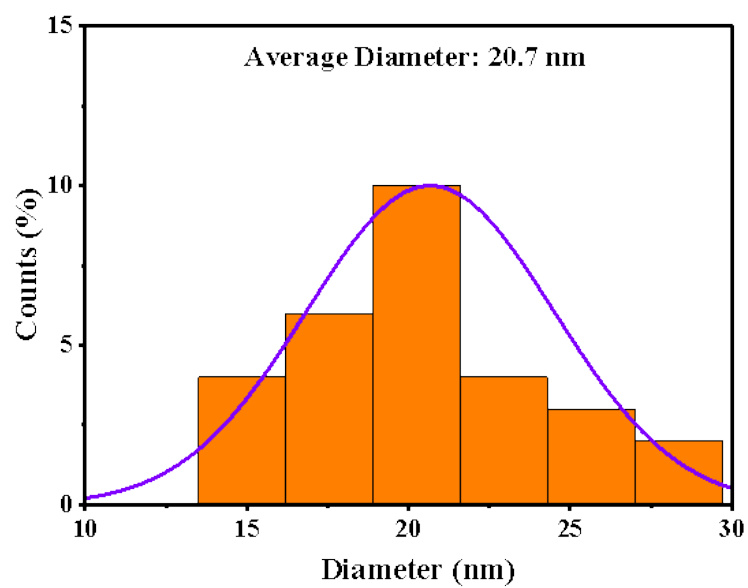

**Fig. S4** Size distribution of CsPbBr<sub>3</sub>-Zn QDs in Fig. 2e.

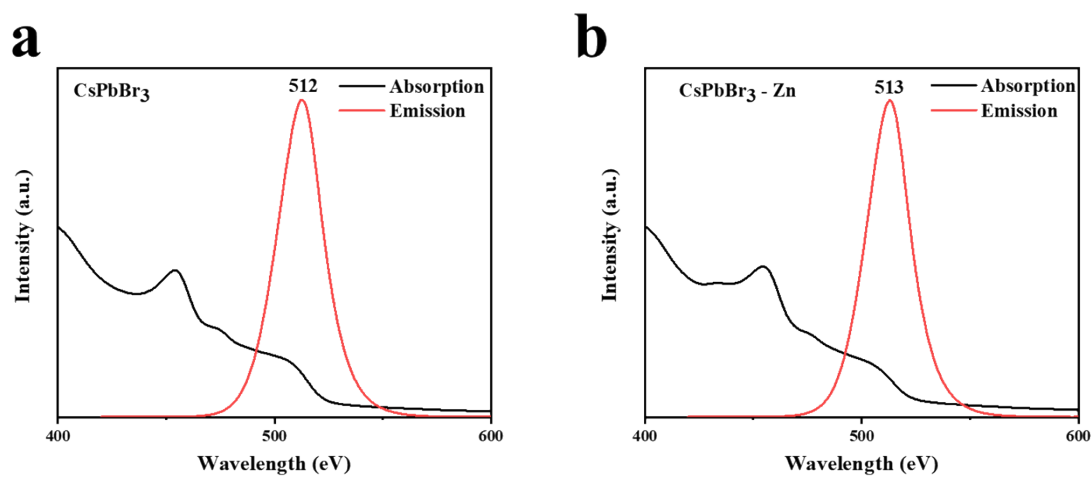

**Fig. S5** PL emission and UV-vis absorption spectra of (a) CsPbBr<sub>3</sub> and (b) CsPbBr<sub>3</sub>-Zn QDs.

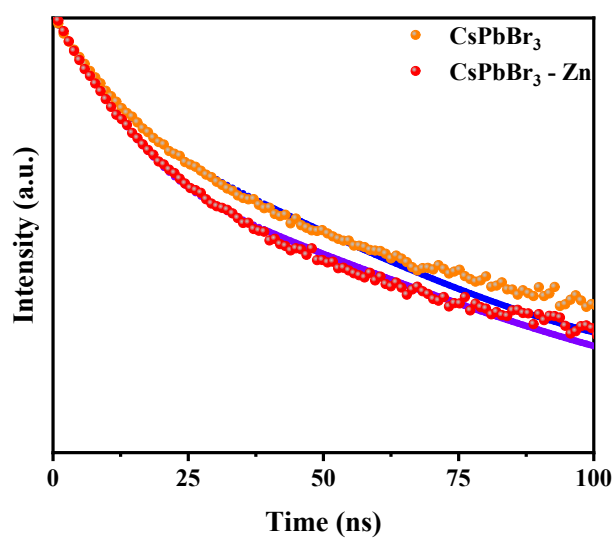

**Fig. S6** Time-resolve PL delay plots of CsPbBr<sub>3</sub> (orange line) and CsPbBr<sub>3</sub>-Zn QDs (red line).

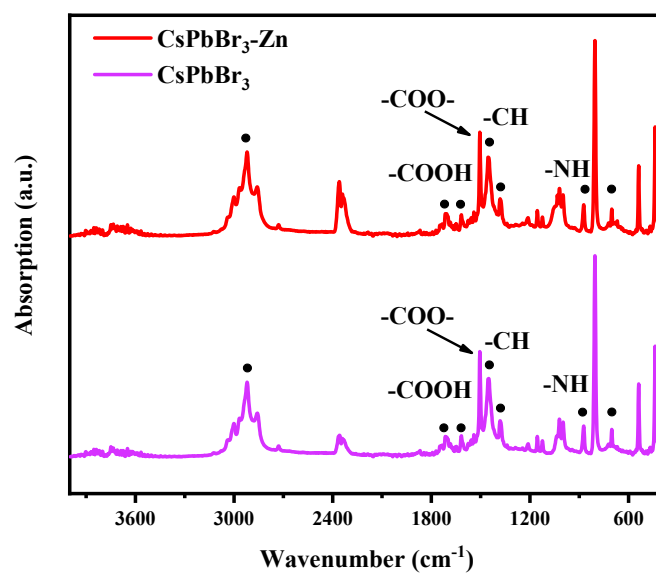

**Fig. S7** Fourier transform infrared spectroscopy of CsPbBr<sub>3</sub> (purple line) and CsPbBr<sub>3</sub>-Zn QDs (red line).

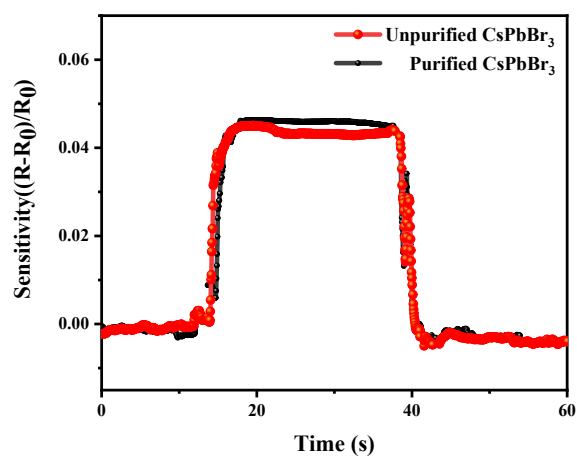

**Fig. S8** Sensor responses of unpurified and purified CsPbBr<sub>3</sub> QDs towards 400 ppm ethanol at RT.

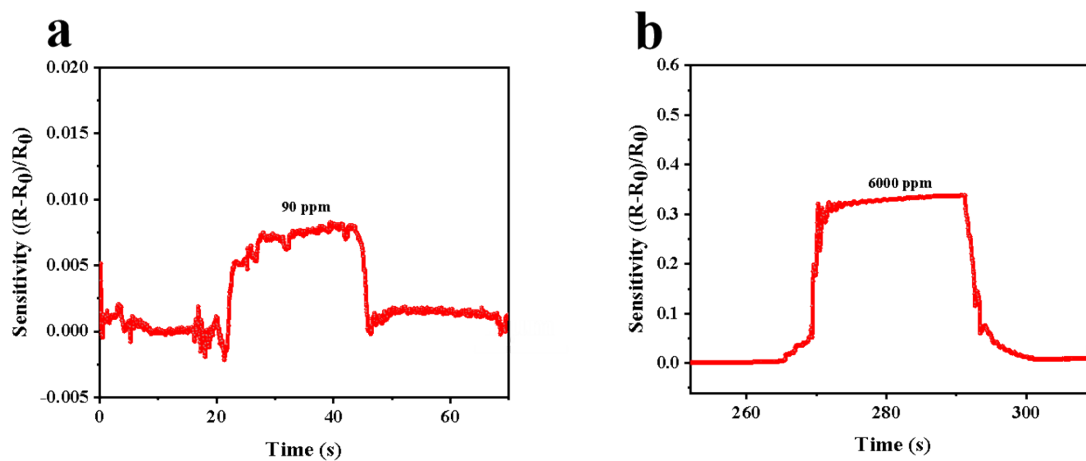

**Fig. S9** (a) Lower and (b) upper detection limits of CsPbBr<sub>3</sub>-Zn sensor.

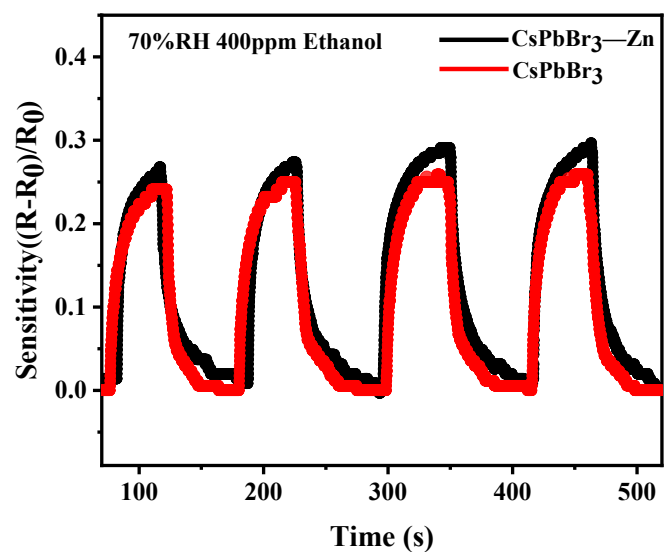

**Fig. S10** Response curves of the sensors based on CsPbBr<sub>3</sub> and CsPbBr<sub>3</sub>-Zn QDs under ambience of 400 ppm ethanol and 70% RH.

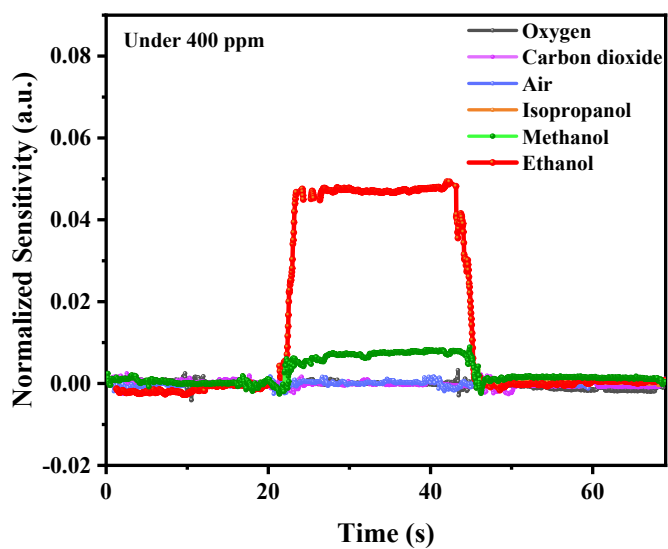

**Fig. S11** Selectivity of a CsPbBr<sub>3</sub>-Zn QD sensor to 400 ppm different gases (oxygen, carbon dioxide, air, isopropanol, methanol and ethanol).

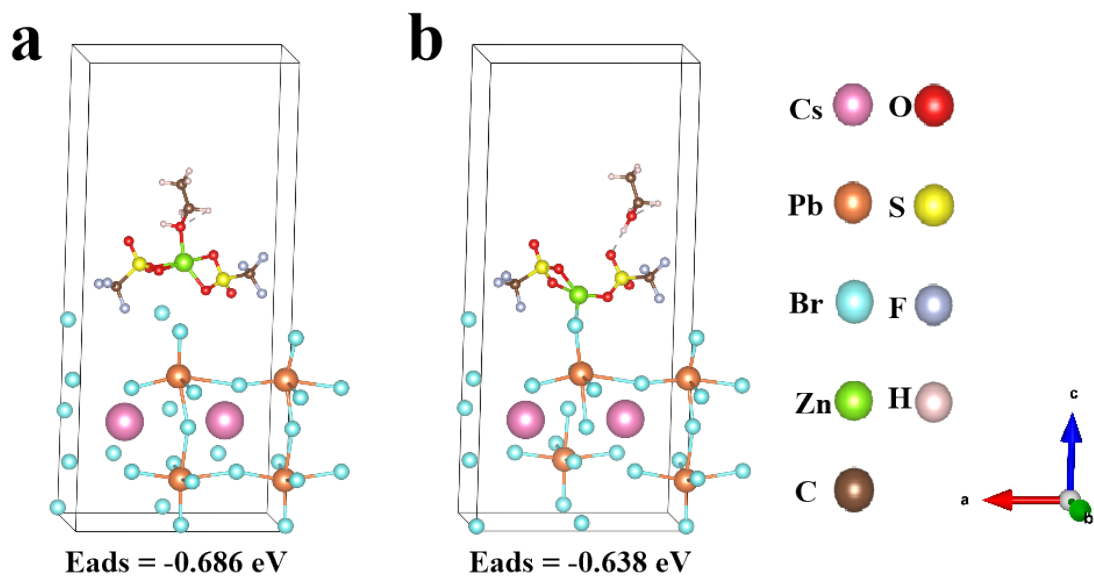

**Fig. S12** Lattice model of ethanol molecule near (a) Zn atom and (b) OTf anion in the  $\text{CsPbBr}_3$  crystal after coordinating with  $\text{Zn}(\text{OTf})_2$ .

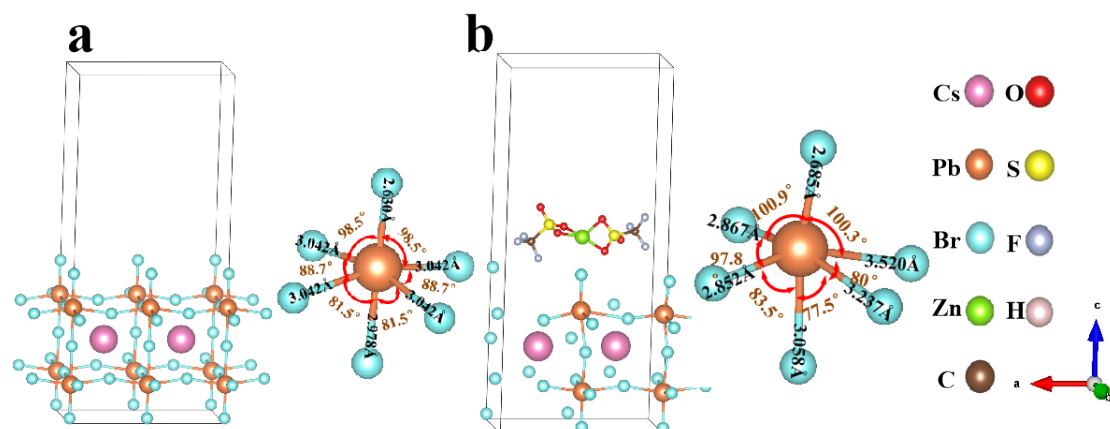

**Fig. S13** Changes of bond length and bond Angle in crystal structure of  $\text{CsPbBr}_3$  QDs by addition of  $\text{Zn}(\text{OTf})_2$ .



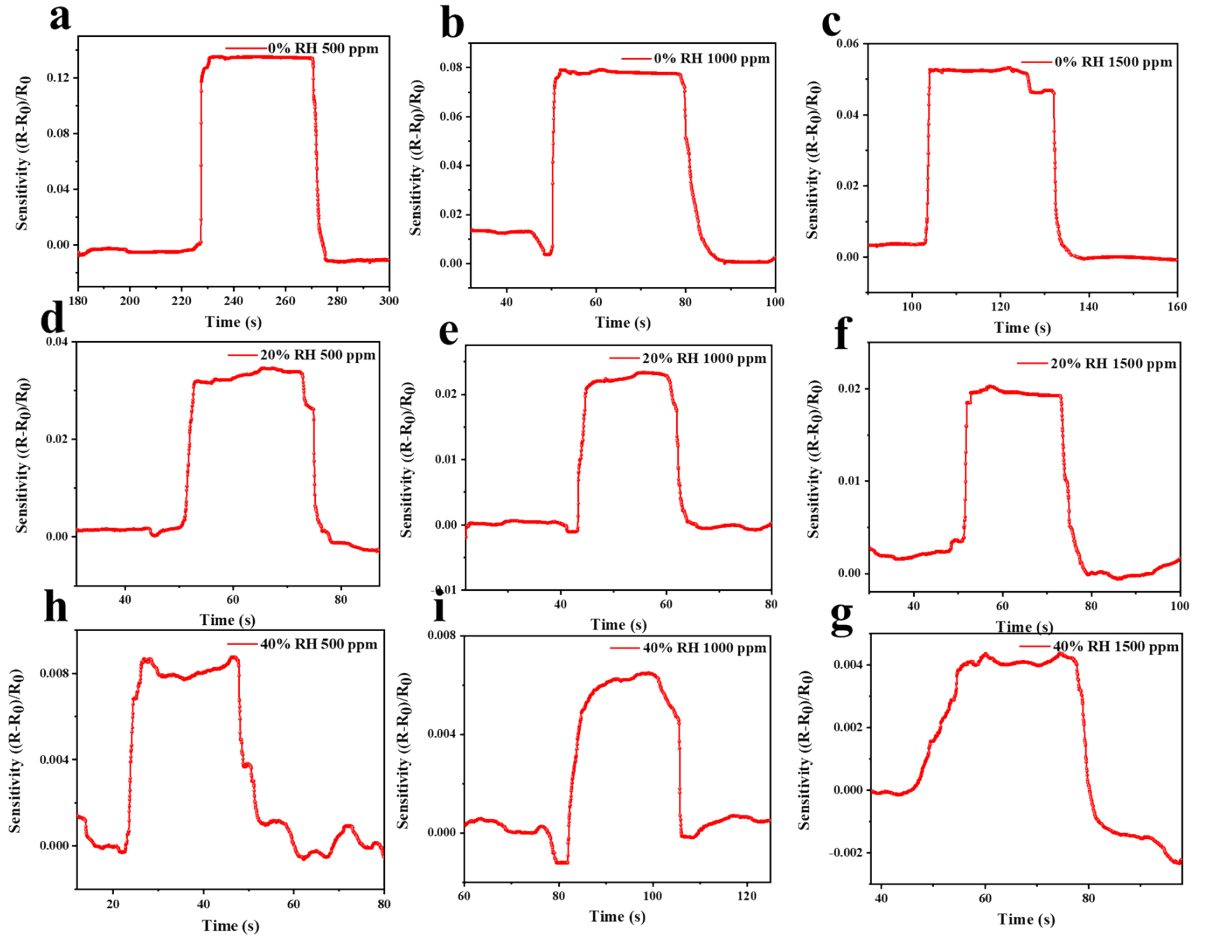

Fig. S14 Gas response curves from a gas sensor based on CsPbBr<sub>3</sub>-Zn QDs under different ethanol concentrations and relative humidity (RH) interference. (a-c) RH value = 0, (d-f) RH = 20%, (h-g) RH = 40%.

In this section, the Gramian Angular Field (GAF) method is used to convert the gas sensor response data into two-dimensional images, and the ResNet34 network [1] model is used to learn the features in the two-dimensional images, which automatically extract the features, finally realizing the recognition of 9 kinds of gas humidity and concentrations.

The specific implementation process of Gramian Angular Field is as follows: First, data is scaled for each sample data, and the data range is scaled to [0,1], and the expression formula is as follows:

$$\tilde{S}_i^t = \frac{S_i^t - \min(S_i)}{\max(S_i) - \min(S_i)}$$

where  $\tilde{S}_i^t$  is the normalized value at time t,  $S_i^t$  is the response value at time t,  $S_i$  and is

the response value within the sampling time range. Next, the scaled normalized time series data  $S_i^t$  is converted to the polar coordinate system, that is, the value is regarded as the cosine value of the included angle, and the expression formula is as follows:

$$\theta_i = \arccos(\tilde{S}_i^t), 0 \leq \tilde{S}_i^t \leq 1.$$

Finally, Gramian angular difference field (GADF) method was used to convert the image. For the conversion of single sample time series data into GAF images, the image size is set to 64, and the single sample time series is converted into images (including GASF and GADF) as shown in Fig. S15 below.

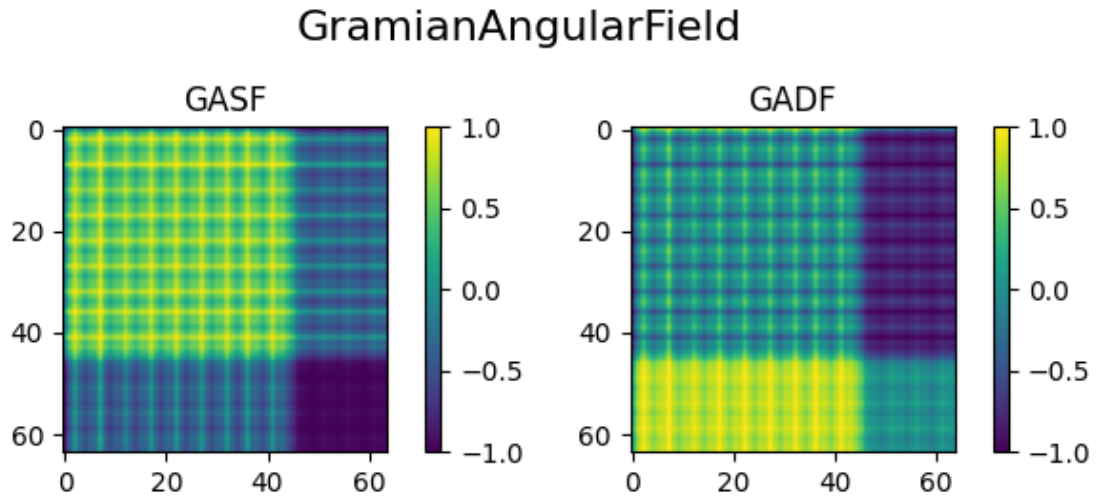

Fig. S15 Conversion from time series data to images.

Considering the difficulty and complexity of collecting gas samples with different humidity and concentrations in the experiment, the classification network model is prone to over-fitting under small samples, so the data augmentation network strategy is adopted in this paper to increase the number of gas samples and make the classification model more robust. Data enhancement network strategies include image rotation ( $90^\circ$ ,  $180^\circ$  and  $270^\circ$ ), flipping, image brightness transformation (brighter and darker), and Gaussian Blur, resulting in an 8-fold amplification of the total number of data samples in this experiment. After that, the image is input into the gas recognition network to realize the training and testing process of recognizing 9 kinds of gas humidity and concentrations. The images after data augmentation are shown in Fig. S16 below.

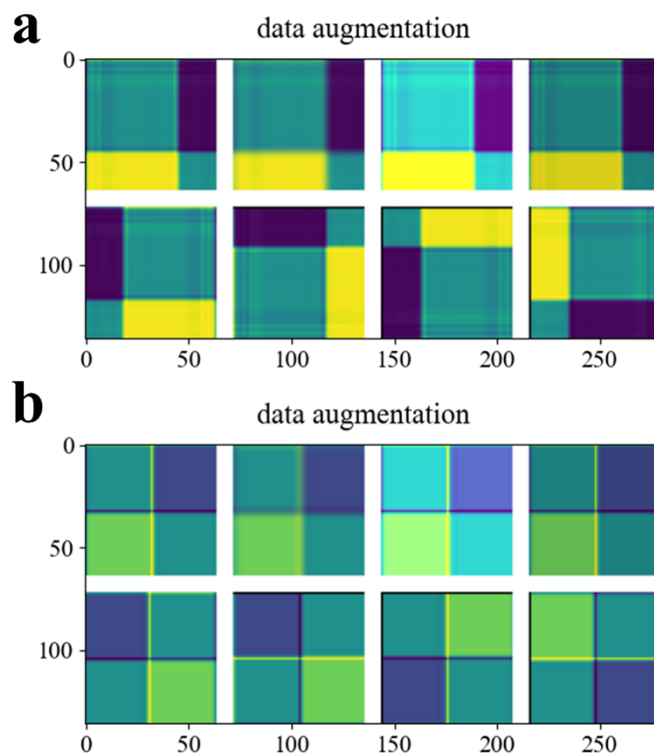

Fig. S16 Images after data augmentation.

Table S1 Fitted results of the PL decay of CsPbBr<sub>3</sub> and CsPbBr<sub>3</sub> – Zn QDs.

| <b>Samples</b>                  | <b><math>\tau_1</math> [ns]</b> | <b><math>A_1</math></b> | <b><math>\tau_2</math> [ns]</b> | <b><math>A_2</math></b> | <b><math>\tau_{ave}</math> [ns]</b> | <b><math>\lambda^2</math></b> |
|---------------------------------|---------------------------------|-------------------------|---------------------------------|-------------------------|-------------------------------------|-------------------------------|
| <b>CsPbBr<sub>3</sub> QD</b>    | 3.39                            | 0.71                    | 13.32                           | 0.29                    | 9.51                                | 0.999                         |
| <b>CsPbBr<sub>3</sub>-Zn QD</b> | 4.86                            | 0.73                    | 16.49                           | 0.27                    | 11.33                               | 0.999                         |

**Table S2** Comparison on gas-sensing performance of CsPbBr<sub>3</sub> – Zn QDs reported in this work with the previously published articles.

| Sensor                                             | Response           | T(°C) | Ethanol. Conc(ppm) | Response time (s) | Recover time (s) | Ref              |
|----------------------------------------------------|--------------------|-------|--------------------|-------------------|------------------|------------------|
| <b>Zn(OTf)<sub>2</sub></b>                         | 4.32% <sup>c</sup> | RT    | 400                | 3.9               | 3.6              | <b>this work</b> |
| <b>Ag/V<sub>2</sub>O<sub>5</sub></b>               | 22.5 <sup>a</sup>  | RT    | 500                | 13                | 7                | [2]              |
| <b>Ga/NiO</b>                                      | 25 <sup>b</sup>    | 250   | 50                 | 8                 | 13               | [3]              |
| <b>CuO</b>                                         | 241% <sup>d</sup>  | 250   | 100                | NA                | NA               | [4]              |
| <b>CuO</b>                                         | 129% <sup>d</sup>  | 300   | 300                | 38                | 462              | [5]              |
| <b>V<sub>2</sub>O<sub>5</sub></b>                  | 81.7% <sup>c</sup> | 280   | 200                | 17.6              | 39.7             | [6]              |
| <b>ZnO/Co<sub>3</sub>O<sub>4</sub></b>             | 34.9 <sup>a</sup>  | 300   | 10                 | 57                | 235              | [7]              |
| <b>PdO<sub>x</sub>/Co<sub>3</sub>O<sub>4</sub></b> | 19.6 <sup>b</sup>  | 130   | 50                 | 43                | 14               | [8]              |
| <b>Co<sub>3</sub>O<sub>4</sub>/NiO</b>             | 4.26 <sup>b</sup>  | 250   | 100                | NA                | NA               | [9]              |
| <b>Ag-ITO</b>                                      | 70% <sup>c</sup>   | 130   | 100                | 45                | 40               | [10]             |
| <b>In<sub>2</sub>O<sub>3</sub></b>                 | 250 <sup>a</sup>   | 250   | 50                 | 16                | 14               | [11]             |
| <b>Ru/WO<sub>3</sub></b>                           | 120 <sup>a</sup>   | 200   | 100                | 1                 | 18               | [12]             |
| <b>Pt/W<sub>18</sub>O<sub>49</sub></b>             | 59 <sup>a</sup>    | 300   | 80                 | 20                | 10               | [13]             |
| <b>In<sub>2</sub>O<sub>3</sub></b>                 | 43.1 <sup>a</sup>  | 300   | 100                | 37.6              | 1454.5           | [14]             |
| <b>Sb/In<sub>2</sub>O<sub>3</sub></b>              | 41.3 <sup>a</sup>  | 320   | 100                | 17                | 36               | [15]             |
| <b>In<sub>2</sub>O<sub>3</sub></b>                 | 180 <sup>a</sup>   | 240   | 200                | 1                 | 93               | [16]             |
| <b>a-MnO<sub>2</sub></b>                           | 30.6 <sup>a</sup>  | 300   | 200                | 30                | 40               | [17]             |
| <b>Au/<br/>In-Ga-Zn-O</b>                          | 27.9 <sup>a</sup>  | 250   | 100                | 102               | 68               | [18]             |
| <b>SnO<sub>2</sub>/CuO</b>                         | 8.8 <sup>a</sup>   | 340   | 250                | 6                 | 10               | [19]             |

|                                        |                  |     |     |    |     |      |
|----------------------------------------|------------------|-----|-----|----|-----|------|
| <b>MoS<sub>2</sub>/TiO<sub>2</sub></b> | 62% <sup>d</sup> | 350 | 100 | 52 | 155 | [20] |
|----------------------------------------|------------------|-----|-----|----|-----|------|

a:( $R_a / R_g$ ), b:( $R_g / R_a$ ), c:( $[R_a - R_g] / R_a * 100\%$ ), d:( $[R_g - R_a] / R_g * 100\%$ ), NA:Not available.

## References

- 1 A. Talapatra, U. Gajera, S. Prasad P, J. A. Chelvane, J. R. Mohanty, Understanding the magnetic microstructure through experiments and machine learning algorithms, *ACS Applied Materials & Interfaces*, 2022,**14**, 50318-50330.
- 2 A. H. Shah, W. Chen, Y. Liu, A. Manan, M. Hanif, I. Mehmood, F. Ahmad, Significant SRS sensing behavior of hydrothermally silver decorated sandwiched-like vanadia (Ag-V<sub>2</sub>O<sub>5</sub>) nanosheets toward ethanol, *Applied Physics A*, 2021, **127**, 477.
- 3 Shailja, K.J. Singh, Ravi Chand Singh. Highly sensitive and selective ethanol gas sensor based on Ga-doped NiO nanoparticles, *Journal of Materials Science: Materials in Electronics*, 2021, **32**, 11274-11290.
- 4 A. Umar, A.A. Ibrahim, H. Algadi, U.T. Nakate, S.P. Choudhury, T. Alsuwian, S. Baskoutas, Selective ethanol gas sensing performance of flower-shaped CuO composed of thin nanoplates, *Journal of Materials Science: Materials in Electronics*, 2021, **32**, 18565-18579.
- 5 A. Bandyopadhyay, K. Mandal, V. Ambardekar, D. Das, S.B. Majumder, Electrophoretic deposition of CuO particulate thick film for ethanol sensing, *Journal of Materials Science: Materials in Electronics*, 2021, **32**, 17324-17335.
- 6 I. J. Tadeo, R. Parasuraman, A. M. Umarji. Highly sensitive and selective ultrasonically nebulized V<sub>2</sub>O<sub>5</sub> thin films towards ethanol and NO<sub>2</sub> gas detection, *Sensors and Actuators B: Chemical*, 2021, **337**, 129811.
- 7 T.L.H. Doan, J.Y. Kim, J.H. Lee, L.H.T. Nguyen, Y.T. Dang, K.B.T. Bui, S.S. Kim, Preparation of n-ZnO/p-Co<sub>3</sub>O<sub>4</sub> heterojunctions from zeolitic imidazolate frameworks (ZIF-8/ZIF-67) for sensing low ethanol concentrations, *Sensors and Actuators B: Chemical*, 2021, **348**, 130684.

- 8 W. Wang, W. Jin, S. Yang, Z. Jian, W. Chen, PdO<sub>x</sub> decorated Co<sub>3</sub>O<sub>4</sub> nanosheets-assembled hollow microcages for enhanced ethanol sensing performance, *Sensors and Actuators B: Chemical*, 2021, **333**, 129583.
- 9 J. Gao, C. Liu, S. Guo, L. Yang, Y. Yang, X. Ku, Hetero-epitaxy growth of cobalt oxide/nickel oxide nanowire arrays on alumina substrates for enhanced ethanol sensing characteristics, *Ceramics International*, 2022, **48**, 3849-3859.
- 10 M. Afrouzmehr, N. Yasrebi, M.H. Sheikhi, Fabrication and characterization of Ag-Decorated indium-tin-oxide nanoparticle based ethanol sensors using an enhanced electrophoretic method, *Ceramics International*, 2021, **47**, 30504-30513.
- 11 C. Shen, N. Xu, R. Guan, L. Yue, W. Zhang. Highly sensitive ethanol gas sensor based on In<sub>2</sub>O<sub>3</sub> spheres, *Ionics.*, 2021, **27**, 3647-3653.
- 12 J. Li, Q. Ding, X. Mo, Z. Zou, P. Cheng, Y. Li, D. He, A highly stable and sensitive ethanol sensor based on Ru-decorated 1D WO<sub>3</sub> nanowires, *RSC Advances*, 2021, **11**, 39130-39141.
- 13 Y. Ou, G. Zhu, W. Zhang, S. Zhang, J. Gao, H. Lu, M. Hojamberdiev. Achieving rapid response and high sensitivity in ethanol gas sensing using a Pt/W<sub>18</sub>O<sub>49</sub> ohmic contact via modulating the adsorption and activation properties: Theoretical and experimental insights, *Sensors and Actuators B: Chemical*, 2021, **347**, 130601.
- 14 T.T. Liang, D.S. Kim, J.W. Yoon, Y.T. Yu, Rapid synthesis of rhombohedral In<sub>2</sub>O<sub>3</sub> nanoparticles via a microwave-assisted hydrothermal pathway and their application for conductometric ethanol sensing, *Sensors and Actuators B: Chemical*, 2021, **346**, 130578.
- 15 X. Li, Y. Wang, P. Cheng, Y. Liu, Y. Zhang, J. Ma, C. Lv, High-performance ethanol sensor of wrinkled microspheres by spray pyrolysis, *Sensors and Actuators B: Chemical*, 2021, **344**, 130309.
- 16 X. Jin, Y. Li, B. Zhang, X. Xu, G. Sun, Y. Wang, Temperature-dependent dual selectivity of hierarchical porous In<sub>2</sub>O<sub>3</sub> nanospheres for sensing ethanol and TEA, *Sensors and Actuators B: Chemical*, 2021, **330**, 129271.
- 17 A. Umar, A.A. Ibrahim, R. Kumar, H. Albargi, W. Zeng, M.A.M. Alhmami, S. Baskoutas, Gas sensor device for high-performance ethanol sensing using  $\alpha$ -MnO<sub>2</sub> nanoparticles, *Materials Letters*, 2021, **286**, 129232.



- 18 R.Y. Peng, W.C. Liu, Study of a high-performance chemoresistive ethanol gas sensor synthesized with au nanoparticles and an amorphous IGZO thin film, *IEEE Transactions on Electron Devices*, 2020, **68**, 753-760.
- 19 J. Zhang, S. Ma, B. Wang, S. Pei, Preparation of composite SnO<sub>2</sub>/CuO nanotubes by electrospinning and excellent gas selectivity to ethanol, *Sensors and Actuators A: Physical*, 2021, **332**, 113090.
- 20 S. Singh, S. Raj, S. Sharma, Ethanol sensing using MoS<sub>2</sub>/TiO<sub>2</sub> composite prepared via hydrothermal method, *Materials Today: Proceedings*, 2021, **46**, 6083-6086.
